# Supplementary material
Source: publisher figshare collection journal article supplement (https://frontiersin.figshare.com/ndownloader/files/16126907)
Supplement: Supplementary file 1 [file 16126907]

Supplementary Material

Microbial diversity exploration of marine hosts at Serrana Bank, a coral atoll of the Seaflower Biosphere Reserve

Astrid Catalina Alvarez-Yela1*, Jeanneth Mosquera-Rendón1, Alejandra Noreña-P1, Marco Cristancho2, Diana López-Alvarez1,3*

1Centro de Bioinformática y Biología Computacional - BIOS, Manizales, Colombia

2Universidad de los Andes, Bogotá, Colombia

3Present address: Facultad de Ciencias Agropecuarias, Universidad Nacional de Colombia, Palmira, Colombia

*** Correspondence:**Astrid Catalina Alvarez-Yela - catalina.alvarez@bios.co

Diana López-Alvarez dianalopez430@gmail.com

Keywords: seaflower, microbial diversity, marine hosts, amplicons, symbiotic interactions

# Supplementary Figures and Tables

## Supplementary Figures


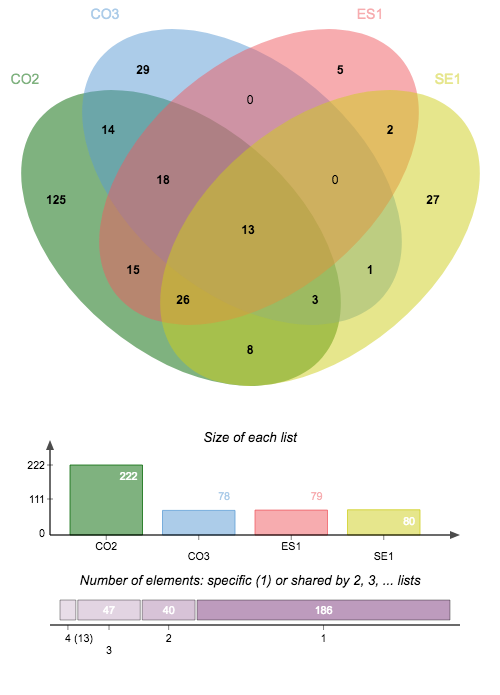

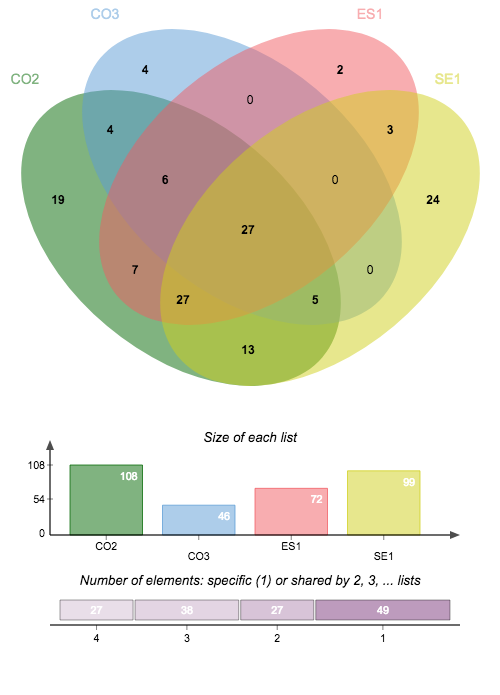


A

B

**Supplementary figure 1.** Taxonomic distribution comparison of bacterial and archaeal communities found in marine hosts. **a)** Orders. **b)** Genera.


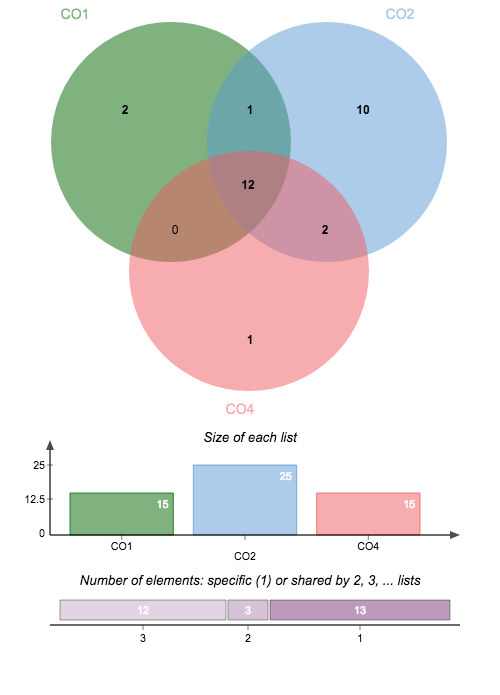

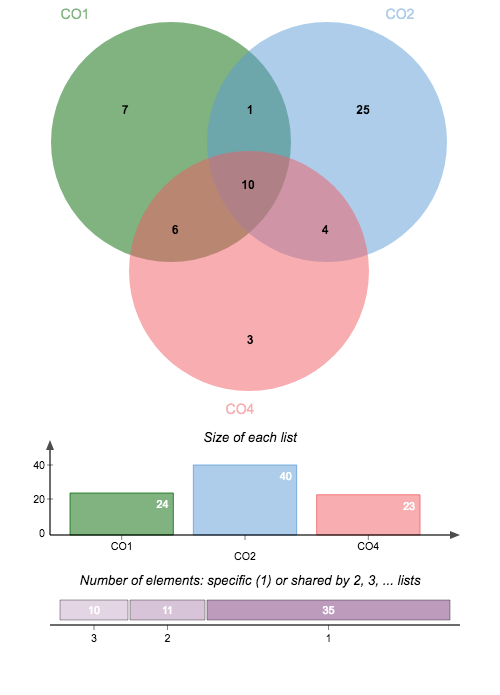

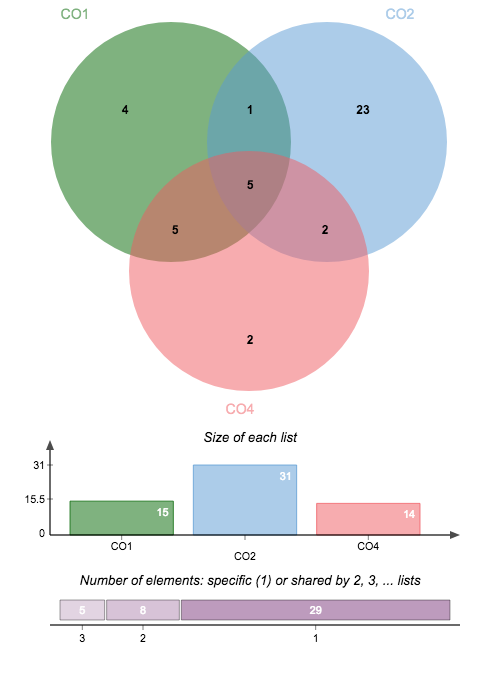


C

A

B

**Supplementary figure 2.** Taxonomic distribution comparison of eukaryotic communities found in marine hosts. **a)** Orders. **b)** Genera. **c)** Species.


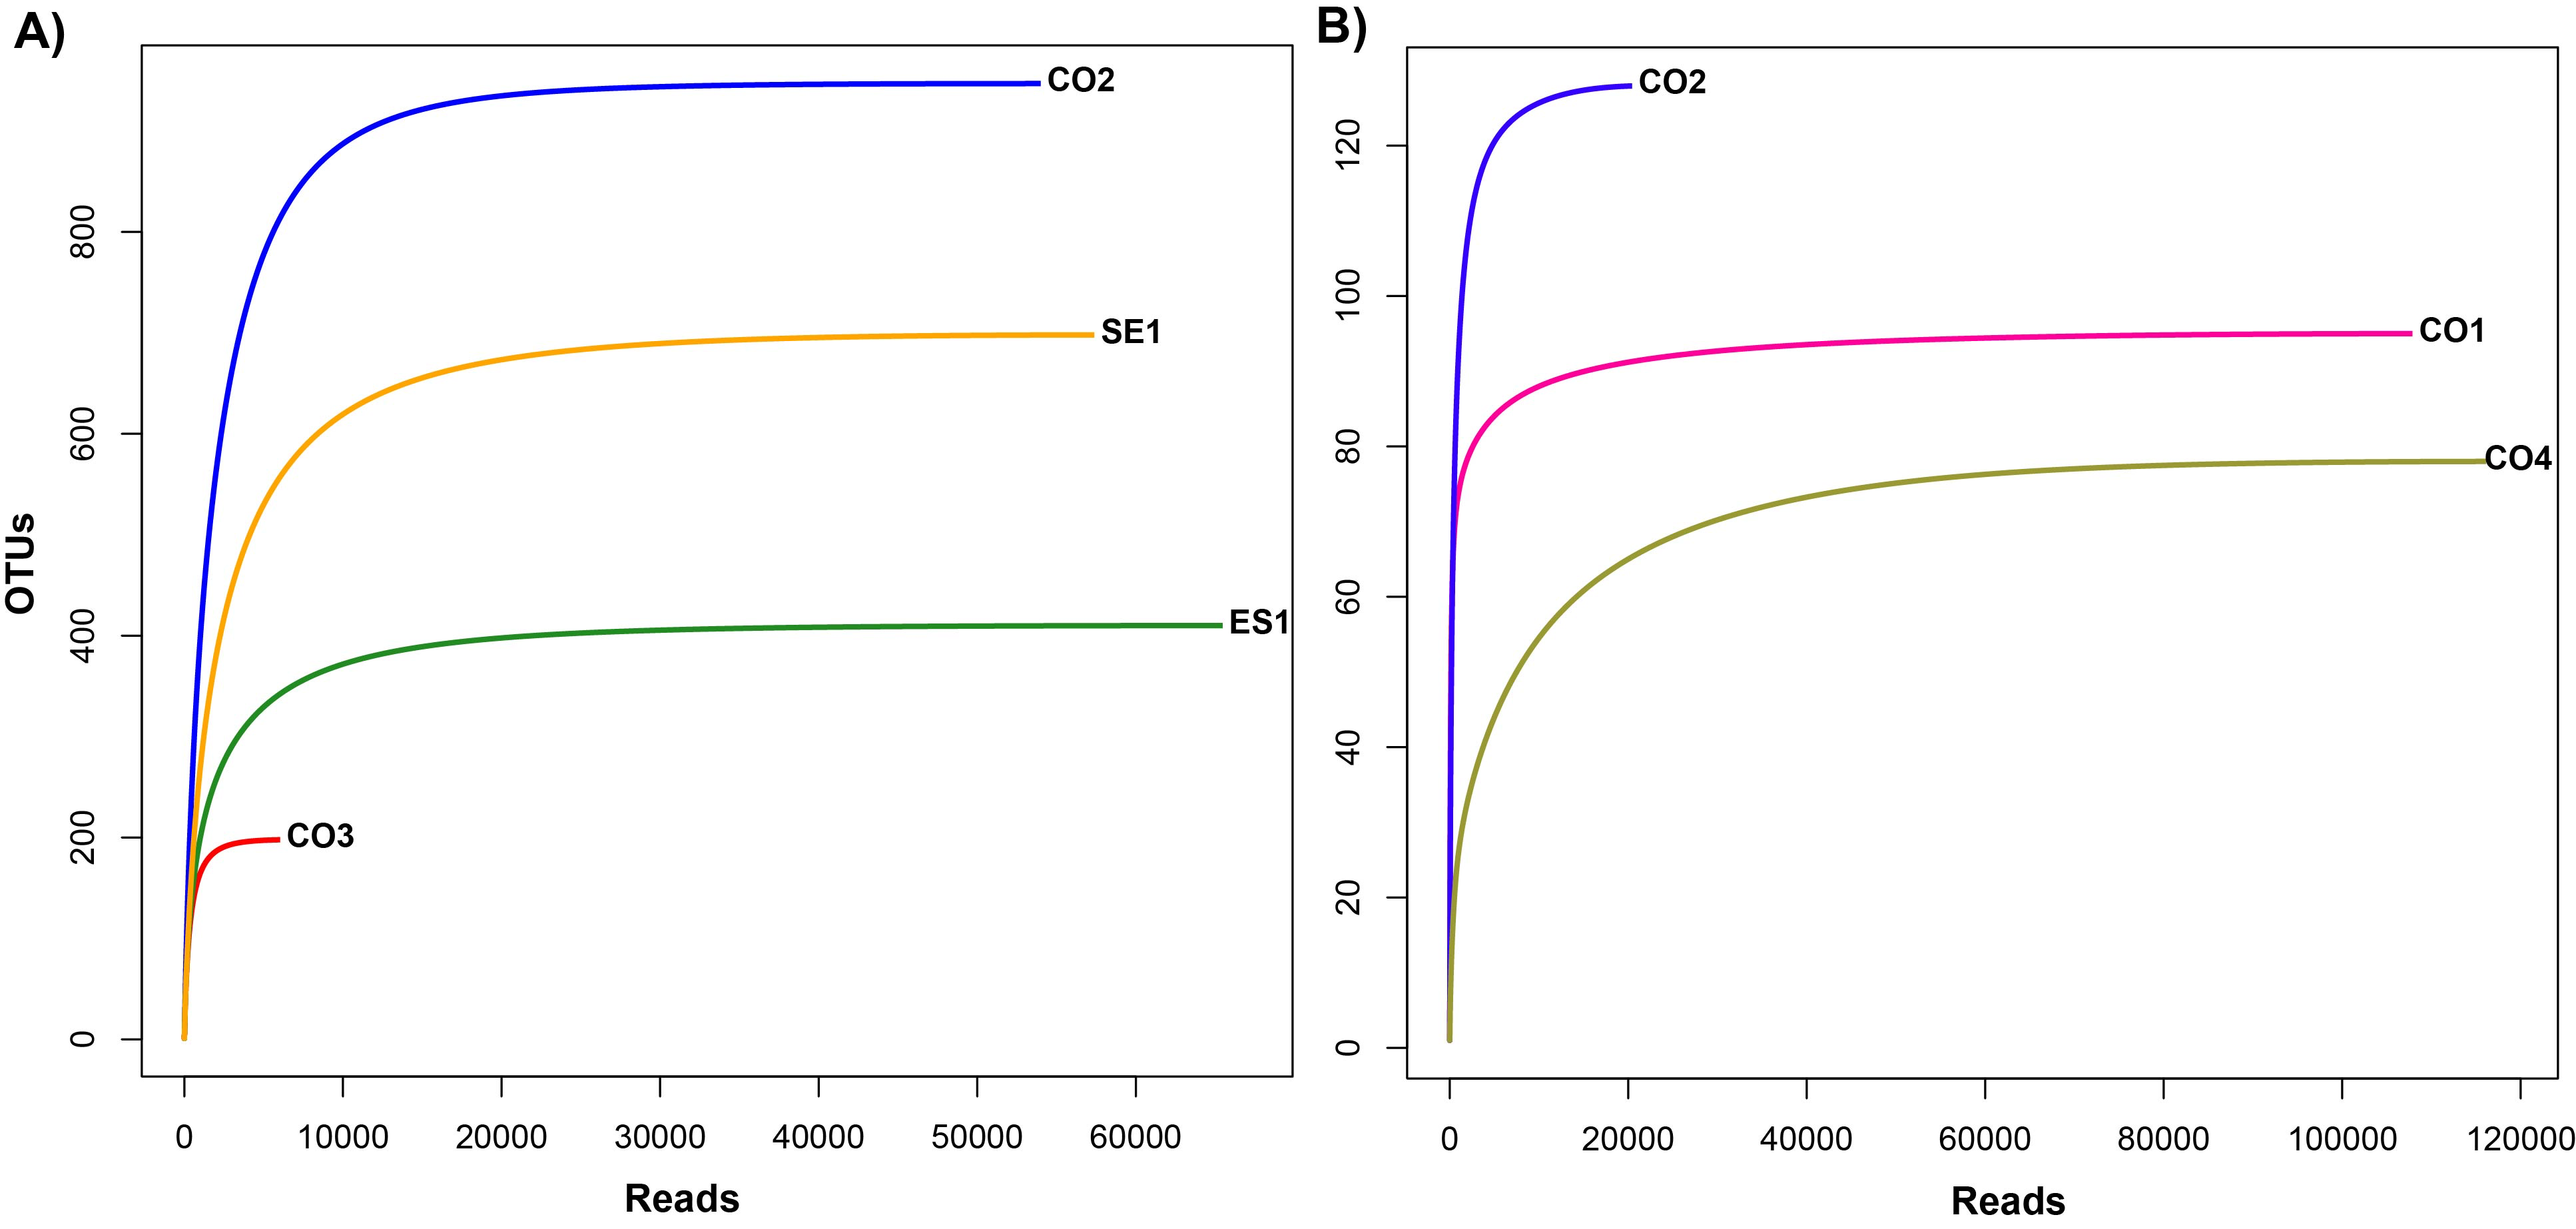


**Supplementary figure 3.** Rarefaction curves from microbial composition analysis of metagenomes at the Seaflower reserve. **A)** Bacterial and archaeal communities. **B)** Eukaryotic communities.

## Supplementary Tables

**Supplementary table 1.** Metadata associated to the samples collected at the Seaflower Biosphere Reserve. Attached excel file (Table S1).

**Supplementary table 2.** Taxonomic assignment for bacterial communities associated to marine hosts at Serrana Bank (Kingdom to species). Attached excel file (Table S2).

**Supplementary table 3.** Taxonomic assignment for bacterial communities associated to marine hosts at Serrana Bank (Kingdom to species). Attached excel file (Table S3).

**Figure legends**

**Figure 2.** Relative abundances of bacterial microorganisms in marine host at the Seaflower Biosphere Reserve. A) Phylum. B) Class: Undefined are composed by reads of different phyla which are organized from highest to lowest abundance in the following way: AncK6, PAUC34f, Poribacteria, Gemmatimonadetes, Planctomycetes, WPS-2, GN02, Chloroflexi, NKB19, Acidobacteria, OD1. C) Order: Undefined are composed by reads of different phyla which are organized from highest to lowest abundance in the following way: Gemmatimonadetes, Chloroflexi, AncK6, PAUC34f, Proteobacteria, Acidobacteria, OD1, SBR1093, Poribacteria, Verrucomicrobia, GN02, Planctomycetes, Cyanobacteria, OP3, TM6, WS3, NKB19, Bacteroidetes, Chlorobi, WPS-2. D) Family: Undefined are composed by reads of different phyla which are organized from highest to lowest abundance in the following way: Cyanobacteria, Proteobacteria, Acidobacteria, Gemmatimonadetes, Chloroflexi, AncK6, PAUC34f, Actinobacteria, Firmicutes, Planctomycetes, Bacteroidetes, OD1, SBR1093, Verrucomicrobia, Poribacteria, GN02, Chlamydiae, WS3, OP3, Parvarchaeota, Tenericutes, TM6, Elusimicrobia, Fusobacteria, NKB19, Chlorobi, WPS-2, Euryarchaeota.
